# Supplementary material
Source: publisher site journal article supplement (https://www.spandidos-publications.com/4825/downloadSupplementary)

Figure S1. Assessing the predictive accuracy of the new model using external data. The area under the ROC curve responded with good prediction accuracy for both the external validation group and the experimental group.

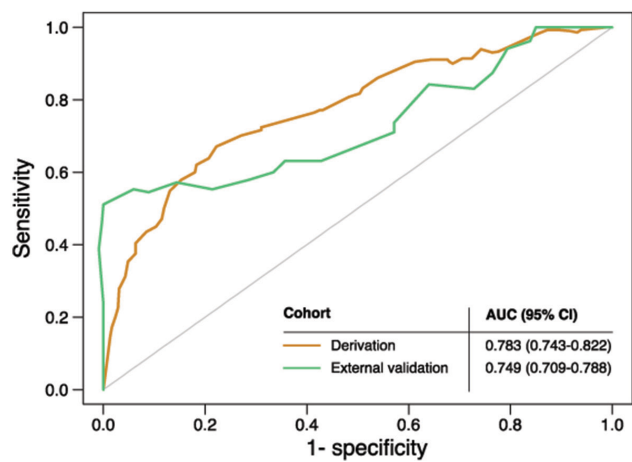

Supplement: Supplementary file 1 [file downloadSupplementary]
